# Supplementary material
Source: Springer Nature journal article supplement (https://www.springermedizin.de/resource/supplementary/12911_2011_535_MOESM1_ESM.pdf/9526122)

**Without treatment**

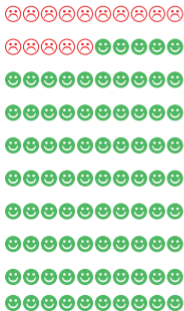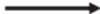

**With treatment**

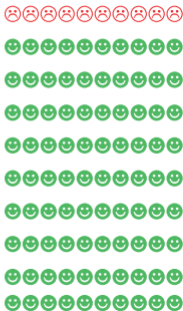

Supplement: MOESM1 [file 9526122]
